# Supplementary material for: Ethnobotanical Study on Wild Edible Plants in Metema District, Amhara Regional State, Ethiopia
Source: Hindawi journal article supplement (doi:10.1155/2023/9243343), 2023-05-10
Supplement: f1 [file 9243343.f1.zip]

Archive with 2 entries (2 files):
- Supplementary Table 1 (1).docx
- Supplementary Table 1.pdf
