# Supplementary material for: Ethnobotanical Study on Wild Edible Plants in Metema District, Amhara Regional State, Ethiopia
Source: Hindawi journal article supplement (doi:10.1155/2023/9243343), 2023-05-10
Supplement: f1 [file 9243343.f1.zip › Supplementary Table 1 (1).docx]

### Supplementary Table 1: Quantitative and Qualitative data of wild edible plants documented in Metema District

| Family Name | Scientific name | Local Name in Amharic | Habit | Habitat | Parts used | Used form | Roles | Availability | No. Reports | Preparation | Other Use Values | Coll. No |
| --- | --- | --- | --- | --- | --- | --- | --- | --- | --- | --- | --- | --- |
| Acanthaceae | *Acanthus sennii* Chiov. | Kosheshila | S | W | Fl | F | SF | Oct | 4 | Suck the nectar | MD, FR | YM032 |
| Anacardiaceae | *Lannea fruticosa* (Hochst. Ex A. Rich) Engle | Digunguna/ Dabija | T | W | Fr | F | FF | Dec-Feb | 12 | Ate the raw fruit | MD, HH, FW, AT, FR | YM015 |
| *Rhus glutinosa* Hochst. ex A. Rich, | Kamo | S | W | Fr | F | SF | Dec-Jan | 9 | Ate the raw fruit | FR | YM029 |
| Apocynaceae | *Carissa spinarum* L. | Agam | S | W | Fr | F | SF | May-Jun | 28 | Ate the raw fruit | MD, FW, FR | YM003 |
| *Saba comorensis* (Boj.).Pichon | Ashama | Cl | W | Fr | F | SF | May-Jul | 43 | Ate the raw fruit | MD | YM69 |
| Balantaceae | *Balanites aegyptiaca* (L.) Del. | Lalo/ Mekie | T | W | Fr | D, F | SF | Oct-Dec | 72 | Ate the raw fruit | MD, CO, FW, AT, FR | YM036 |
| Bolentaceae | *Boletus edulis* Bull. Ex Fries | Abeba | H | W | Flower | F | SF | May-Agu | 42 | Cooked by adding salt, oil, onion, then ate as it is or with ENJERA | - | YM062 |
| Boraginaceae | *Cordia africana* Lam. | Wanza | T | Hg | Fr | F, D | SF | Feb-Mar | 21 | Ate the raw fruit | MD, CO, HH, AT, FR | YM052 |
| Capparidaceae | *Capparis tomentosa* Lam. | YezinjeroGimero | S | W | Fr | F | FF | Nov-Jan | 13 | Ate the raw fruit | FW | , YM059 |
| Celastraceae | *Maytenus senegalensis* (Lam.) Exell | Koshikosh | T | W | Fr | F | FF | Feb-Mar | 5 | Ate the raw fruit | FR | YM033 |
| Combretaceae | *Terminalia laxitlora* Engl. & Diels | Wonbela | T | W | Fr | F | FF | Feb | 1 | Ate the raw fruit | MD, FW, AT, FR | YM054 |
| Dioscoreaceae | *Dioscorea*  *praehensilis* Benth. | Sinsa | Cl | W | R | F | FF | Any time | 27 | Chopped and cooked then ate with bread/ Cooked then ate | --- | YM064 |
| Ebenaceae | *Diospyros abyssinica* (Hiern) F. White | Serkin | T | W | Fr | F | SF | Jan-Feb | 78 | Ate the raw fruit | CO, HH, FW, AT, FR | YM043 |
| *Diospyros mespiliformis* Hochst. ex A. DC | Gurmacha | T | W | Fr | F | SF | Nov-Jan | 35 | Ate the raw fruit | FR | YM028 |
| Euphorbiaceae | *Flueggea Virosa* (Willd.) Voigt. | Shasha/ Ayahda | T | W | Fr | F | SF | Jul-Sep | 46 | Ate the raw fruit | MD, FW, AT, FR | YM044 |
| Fabaceae | *Acacia polyacantha* Willd. | Gimero/ Giramda | T | W | G, ISB | F | FF | Any time | 9 | Eat the gum; chewed ISB then swallowed the Juice | MD, CO, HH, FW, FR | YM024 |
| *Acacia seyal* Del. | QeyGirar | T | W | G, ISB | F | SF | Any time | 5 | Eat the gum; chewed ISB then swallowed the Juice | FW, AT, FR | YM041 |
| *Acacia sieberiana* DC. | Nech Girar | T | W | G, ISB | F | SF | Any time | 6 | Eat the gum; chewed ISB then swallowed the Juice | MD, CO, FW, FR | YM040 |
| *Dichrostachys cinerea* (L.) Wight & Arn. | Gorgoro/ Andera | S | W | Fr | F | SF | Aug-Oct | 7 | Ate the raw fruit | MD, CO, FW, AT, FR | YM026 |
| *Piliostigma thonningii* (Schumach.) Milne-Redh. | YekolaWanza | T | W | R | F | SF | Jun-Aug | 18 | Cooked by adding salt, oil, then ate with bread or ENJERA | - | YM057 |
| *Tamarindus indica* L. | Kumer | T | W | Fr | F | SF | Jan-Mar | 62 | Ate the raw fruit | MD, FW, AT, FR | YM35 |
| Malvaceae | *Abelmoschus esculentus* (L.) Moench. | Bamia | H | W | Fr | F | SF | Jun-Aug | 17 | Chopped and cooked by added to stew as a spice | - | YM061 |
| *Hibiscus cannabinus* L. | YeberehaWayka | H | W | Fr | F, D | SF | Dec-Feb | 35 | Chopped fresh fruit or ground the dried fruit then added to stew as a spice | - | YM66 |
| *Hibiscus esculentus* L. | Wayka | H | FL | L | F | SF | Jun-Aug | 31 | Cooked after chopping, then ate | - | YM67 |
| Meliaceae | *Ekebergia capensis* Sparrm. | Kudkuda | T | W | Fr | F | SF | Jan-Apr | 37 | Ate the raw fruit | FW, FR | YM034 |
| Moraceae | *Adansonia digitata* L. | Diza | T | W | Fr | D | SF | Feb-Mar | 69 | Ate the raw fruit | MD, HH, FW, FR | YM016 |
| *Ficus sycomorus* L. | Banba | T | W | Fr | F | SF | Nov-Jan | 24 | Ate the raw fruit | MD, HH, FW, AT, FR | YM005 |
| *Ficus sur* Forssk. | Shola | T | W | Fr | F, D | SF | Feb-Apr | 57 | Ate the raw fruit | MD, FR | YM048 |
| *Ficus thonningii* Blume | Chibaha | T | W | Fr | F | SF | Jan-Apr | 21 | Ate the raw fruit | MD, HH, FW, FR |  |
| *Ficus vallis-choudae* Del. | Banbulda | T | W | Fr | F | FF | Feb-Mar | 17 | Ate the raw fruit | CO, HH, FR | YM006 |
| *Ficus vasta* Forssk. | Warka | T | W | Fr | F | FF | Mar-Apr | 13 | Ate the raw fruit | MD | YM053 |
| Moringaceae | *Moringa stenopetala*  (Baker f.)Kufod. | Shiferaw | T | Hg | L | D | SF | Any time | 11 | Cooked with meat or egg then eat | MD, FW, FR | YM046 |
| Myrtaceae | *Syzygium guineense* (Willd) DC. | Dokima | T | W | Fr | F | SF | Apr-Jun | 44 | Ate the raw fruit | MD, CO, HH, FW, FR | YM017 |
| Oleaceae | *Ximenia americana* L. | Enqoy | S | W | Fr | F | SF | Feb-Mar | 67 | Ate the raw fruit | MD, FW, FR | YM018 |
| Plumbaginaceae | *Plumbago zeylanica* L. | Amera | H | W, FL | L | F | SF | Jun-Aug | 39 | Chopped & cooked by adding oil, salt, onion then ate with ENJERA | FR, MD | YM68 |
| Rhamnaceae | *Ziziphus abyssinica* Hochst. ex A. Rich. | Abeterie | T | W | Fr | F | FF | Jan-mar | 18 | Ate the raw fruit | MD, FW, AT, FR | YM002 |
| *Ziziphus spina-christi* (L.) Desf. | Gaba/ Arka | S | W | Fr | F, D | SF | Jan-Apr | 68 | Ate the raw fruit | MD, CO, HH, AT, FR | YM022 |
| Rubiaceae | *Crateva adansonii* DC. | Gala zabia/ Dingayseber | S | W | Fr | F | SF | Feb-May | 6 | Ate the raw fruit | FR | YM014 |
| *Gardenia ternifolia* Schumach. &Thonn. | Gambilo | T | W | Fr | F | SF | May-Jun | 7 | Ate the raw fruit | FR | YM023 |
| Solanaceae | *Discopodium penninervium* Hochst. | Ameraro | S | W | L | F | FF | Jun-Aug | 26 | Chopped, cooked then ate | - | YM065 |
| Sterculiaceae | *Sterculia setigera* Del. | Darlie | T | W | ISB | F | FF | Any time | 5 | Chewed ISB then swallowed the Juice | AT, FR | YM012 |
| Tiliaceae | *Corchorus olitorius* L. | Kudra/Melekuya | H | FL | L | F | SF | Jun-Aug | 71 | Chopped and cooked by adding flour, spice, salt, onion, oil, then eaten with ENJERA | MD, FR | YM063 |
| *Grewia ferruginea* Hochst. ex A.Rich. | Lenquata | S | W | Fr | F, D | SF | Dec-Feb | 18 | Ate the raw fruit | MD, CO, AT, FR | YM037 |
| *Grewia mollis* A.Juss. | Betre Mussie | T | W | Fr | F | SF | Jun-Sep | 6 | Ate the raw fruit |  | YM008 |

**Legend**: Plant Habit (S: shrub, T: tree, Cl: climber, H: herb); Plant Parts Used (Fr: fruit, L: leaf, ISB: internal stem bark, R: root); Habitat (W: wild area, Hg: home garden, FL: farm land); Mode of utilization (F: fresh, D: dried); Used form (F: fresh, D: dried); Role in Food Security ( SF: supplementary food, FF: famine food); Other Use Values ( MD: medicine, FR: fodder, HH: household implements, FW: fuel wood, AT: agricultural tools, CO: construction.
