# Supplementary material for: Ethnobotanical Study on Wild Edible Plants in Metema District, Amhara Regional State, Ethiopia
Source: Hindawi journal article supplement (doi:10.1155/2023/9243343), 2023-05-10
Supplement: f1 [file 9243343.f1.zip › Supplementary Table 1.pdf]

**Supplementary Table 1: Quantitative and Qualitative data of wild edible plants documented in Metema District**

| Family Name   | Scientific name                                    | Local Name in Amharic | Habit | Habitat | Parts used | Used form | Roles | Availability | No. Reports | Preparation                                                         | Other Use Values   | Coll. No |
|---------------|----------------------------------------------------|-----------------------|-------|---------|------------|-----------|-------|--------------|-------------|---------------------------------------------------------------------|--------------------|----------|
| Acanthaceae   | <i>Acanthus sennii</i> Chiov.                      | Kosheshila            | S     | W       | Fl         | F         | SF    | Oct          | 4           | Suck the nectar                                                     | MD, FR             | YM032    |
| Anacardiaceae | <i>Lannea fruticosa</i> (Hochst. Ex A. Rich) Engle | Digunguna/ Dabija     | T     | W       | Fr         | F         | FF    | Dec-Feb      | 12          | Ate the raw fruit                                                   | MD, HH, FW, AT, FR | YM015    |
|               | <i>Rhus glutinosa</i> Hochst. ex A. Rich,          | Kamo                  | S     | W       | Fr         | F         | SF    | Dec-Jan      | 9           | Ate the raw fruit                                                   | FR                 | YM029    |
| Apocynaceae   | <i>Carissa spinarum</i> L.                         | Agam                  | S     | W       | Fr         | F         | SF    | May-Jun      | 28          | Ate the raw fruit                                                   | MD, FW, FR         | YM003    |
|               | <i>Saba comorensis</i> (Boj.).Pichon               | Ashama                | Cl    | W       | Fr         | F         | SF    | May-Jul      | 43          | Ate the raw fruit                                                   | MD                 | YM69     |
| Balantaceae   | <i>Balanites aegyptiaca</i> (L.) Del.              | Lalo/ Mekie           | T     | W       | Fr         | D, F      | SF    | Oct-Dec      | 72          | Ate the raw fruit                                                   | MD, CO, FW, AT, FR | YM036    |
| Bolentaceae   | <i>Boletus edulis</i> Bull. Ex Fries               | Abeba                 | H     | W       | Flower     | F         | SF    | May-Agu      | 42          | Cooked by adding salt, oil, onion, then ate as it is or with ENJERA | -                  | YM062    |
| Boraginaceae  | <i>Cordia africana</i> Lam.                        | Wanza                 | T     | Hg      | Fr         | F, D      | SF    | Feb-Mar      | 21          | Ate the raw fruit                                                   | MD, CO, HH, AT, FR | YM052    |
| Capparidaceae | <i>Capparis tomentosa</i> Lam.                     | YezinjeroGimero       | S     | W       | Fr         | F         | FF    | Nov-Jan      | 13          | Ate the raw fruit                                                   | FW                 | , YM059  |
| Celastraceae  | <i>Maytenus senegalensis</i> (Lam.) Exell          | Koshikosh             | T     | W       | Fr         | F         | FF    | Feb-Mar      | 5           | Ate the raw fruit                                                   | FR                 | YM033    |
| Combretaceae  | <i>Terminalia laxitlora</i> Engl. & Diels          | Wonbela               | T     | W       | Fr         | F         | FF    | Feb          | 1           | Ate the raw fruit                                                   | MD, FW, AT, FR     | YM054    |
| Dioscoreaceae | <i>Dioscorea praehensilis</i> Benth.               | Sinsa                 | Cl    | W       | R          | F         | FF    | Any time     | 27          | Chopped and cooked then ate with bread/ Cooked then ate             | ---                | YM064    |
| Ebenaceae     | <i>Diospyros abyssinica</i> (Hiern) F. White       | Serkin                | T     | W       | Fr         | F         | SF    | Jan-Feb      | 78          | Ate the raw fruit                                                   | CO, HH, FW, AT, FR | YM043    |
|               | <i>Diospyros mespiliformis</i> Hochst. ex A. DC    | Gurmacha              | T     | W       | Fr         | F         | SF    | Nov-Jan      | 35          | Ate the raw fruit                                                   | FR                 | YM028    |

|               |                                                              |                    |   |    |           |      |    |             |    |                                                                                         |                          |       |
|---------------|--------------------------------------------------------------|--------------------|---|----|-----------|------|----|-------------|----|-----------------------------------------------------------------------------------------|--------------------------|-------|
| Euphorbiaceae | <i>Flueggea Virosa</i><br>(Willd.) Voigt.                    | Shasha/ Ayahda     | T | W  | Fr        | F    | SF | Jul-Sep     | 46 | Ate the raw fruit                                                                       | MD, FW,<br>AT, FR        | YM044 |
| Fabaceae      | <i>Acacia polyacantha</i><br>Willd.                          | Gimero/<br>Giramda | T | W  | G,<br>ISB | F    | FF | Any<br>time | 9  | Eat the gum;<br>chewed ISB then<br>swallowed the<br>Juice                               | MD, CO,<br>HH, FW,<br>FR | YM024 |
|               | <i>Acacia seyal</i> Del.                                     | QeyGirar           | T | W  | G,<br>ISB | F    | SF | Any<br>time | 5  | Eat the gum;<br>chewed ISB then<br>swallowed the<br>Juice                               | FW, AT,<br>FR            | YM041 |
|               | <i>Acacia sieberiana</i> DC.                                 | Nech Girar         | T | W  | G,<br>ISB | F    | SF | Any<br>time | 6  | Eat the gum;<br>chewed ISB then<br>swallowed the<br>Juice                               | MD, CO,<br>FW, FR        | YM040 |
|               | <i>Dichrostachys cinerea</i><br>(L.) Wight & Arn.            | Gorgoro/ Andera    | S | W  | Fr        | F    | SF | Aug-<br>Oct | 7  | Ate the raw fruit                                                                       | MD, CO,<br>FW, AT,<br>FR | YM026 |
|               | <i>Piliostigma thonningii</i><br>(Schumach.) Milne-<br>Redh. | YekolaWanza        | T | W  | R         | F    | SF | Jun-<br>Aug | 18 | Cooked by adding<br>salt, oil, then ate<br>with bread or<br>ENJERA                      | -                        | YM057 |
|               | <i>Tamarindus indica</i> L.                                  | Kumer              | T | W  | Fr        | F    | SF | Jan-Mar     | 62 | Ate the raw fruit                                                                       | MD, FW,<br>AT, FR        | YM35  |
| Malvaceae     | <i>Abelmoschus</i><br><i>esculentus</i> (L.)<br>Moench.      | Bamia              | H | W  | Fr        | F    | SF | Jun-<br>Aug | 17 | Chopped and<br>cooked by added<br>to stew as a spice                                    | -                        | YM061 |
|               | <i>Hibiscus cannabinus</i><br>L.                             | YeberehaWayka      | H | W  | Fr        | F, D | SF | Dec-<br>Feb | 35 | Chopped fresh<br>fruit or ground the<br>dried fruit then<br>added to stew as a<br>spice | -                        | YM66  |
|               | <i>Hibiscus esculentus</i> L.                                | Wayka              | H | FL | L         | F    | SF | Jun-<br>Aug | 31 | Cooked after<br>chopping, then ate                                                      | -                        | YM67  |
| Meliaceae     | <i>Ekebergia capensis</i><br>Sparrm.                         | Kudkuda            | T | W  | Fr        | F    | SF | Jan-Apr     | 37 | Ate the raw fruit                                                                       | FW, FR                   | YM034 |
| Moraceae      | <i>Adansonia digitata</i> L.                                 | Diza               | T | W  | Fr        | D    | SF | Feb-<br>Mar | 69 | Ate the raw fruit                                                                       | MD, HH,<br>FW, FR        | YM016 |
|               | <i>Ficus sycomorus</i> L.                                    | Banba              | T | W  | Fr        | F    | SF | Nov-Jan     | 24 | Ate the raw fruit                                                                       | MD, HH,<br>FW, AT,<br>FR | YM005 |
|               | <i>Ficus sur</i> Forssk.                                     | Shola              | T | W  | Fr        | F, D | SF | Feb-Apr     | 57 | Ate the raw fruit                                                                       | MD, FR                   | YM048 |

|                |                                                |                         |   |       |     |      |    |          |    |                                                                                     |                    |       |
|----------------|------------------------------------------------|-------------------------|---|-------|-----|------|----|----------|----|-------------------------------------------------------------------------------------|--------------------|-------|
|                | <i>Ficus thonningii</i> Blume                  | Chibaha                 | T | W     | Fr  | F    | SF | Jan-Apr  | 21 | Ate the raw fruit                                                                   | MD, HH, FW, FR     |       |
|                | <i>Ficus vallis-choudae</i> Del.               | Banbulda                | T | W     | Fr  | F    | FF | Feb-Mar  | 17 | Ate the raw fruit                                                                   | CO, HH, FR         | YM006 |
|                | <i>Ficus vasta</i> Forssk.                     | Warka                   | T | W     | Fr  | F    | FF | Mar-Apr  | 13 | Ate the raw fruit                                                                   | MD                 | YM053 |
| Moringaceae    | <i>Moringa stenopetala</i> (Baker f.)Kufod.    | Shiferaw                | T | Hg    | L   | D    | SF | Any time | 11 | Cooked with meat or egg then eat                                                    | MD, FW, FR         | YM046 |
| Myrtaceae      | <i>Syzygium guineense</i> (Willd) DC.          | Dokima                  | T | W     | Fr  | F    | SF | Apr-Jun  | 44 | Ate the raw fruit                                                                   | MD, CO, HH, FW, FR | YM017 |
| Oleaceae       | <i>Ximenia americana</i> L.                    | Enqoy                   | S | W     | Fr  | F    | SF | Feb-Mar  | 67 | Ate the raw fruit                                                                   | MD, FW, FR         | YM018 |
| Plumbaginaceae | <i>Plumbago zeylanica</i> L.                   | Amera                   | H | W, FL | L   | F    | SF | Jun-Aug  | 39 | Chopped & cooked by adding oil, salt, onion then ate with ENJERA                    | FR, MD             | YM68  |
| Rhamnaceae     | <i>Ziziphus abyssinica</i> Hochst. ex A. Rich. | Abeterie                | T | W     | Fr  | F    | FF | Jan-mar  | 18 | Ate the raw fruit                                                                   | MD, FW, AT, FR     | YM002 |
|                | <i>Ziziphus spina-christi</i> (L.) Desf.       | Gaba/ Arka              | S | W     | Fr  | F, D | SF | Jan-Apr  | 68 | Ate the raw fruit                                                                   | MD, CO, HH, AT, FR | YM022 |
| Rubiaceae      | <i>Crateva adansonii</i> DC.                   | Gala zabia/ Dingayseber | S | W     | Fr  | F    | SF | Feb-May  | 6  | Ate the raw fruit                                                                   | FR                 | YM014 |
|                | <i>Gardenia ternifolia</i> Schumach. &Thonn.   | Gambilo                 | T | W     | Fr  | F    | SF | May-Jun  | 7  | Ate the raw fruit                                                                   | FR                 | YM023 |
| Solanaceae     | <i>Discopodium penninervium</i> Hochst.        | Ameraro                 | S | W     | L   | F    | FF | Jun-Aug  | 26 | Chopped, cooked then ate                                                            | -                  | YM065 |
| Sterculiaceae  | <i>Sterculia setigera</i> Del.                 | Darlie                  | T | W     | ISB | F    | FF | Any time | 5  | Chewed ISB then swallowed the Juice                                                 | AT, FR             | YM012 |
| Tiliaceae      | <i>Corchorus olitorius</i> L.                  | Kudra/Melekuya          | H | FL    | L   | F    | SF | Jun-Aug  | 71 | Chopped and cooked by adding flour, spice, salt, onion, oil, then eaten with ENJERA | MD, FR             | YM063 |
|                | <i>Grewia ferruginea</i> Hochst. ex A.Rich.    | Lenquata                | S | W     | Fr  | F, D | SF | Dec-Feb  | 18 | Ate the raw fruit                                                                   | MD, CO, AT, FR     | YM037 |

|                              |              |   |   |    |   |    |         |   |                   |       |
|------------------------------|--------------|---|---|----|---|----|---------|---|-------------------|-------|
| <i>Grewia mollis</i> A.Juss. | Betre Mussie | T | W | Fr | F | SF | Jun-Sep | 6 | Ate the raw fruit | YM008 |
|------------------------------|--------------|---|---|----|---|----|---------|---|-------------------|-------|

**Legend:** Plant Habit (S: shrub, T: tree, Cl: climber, H: herb); Plant Parts Used (Fr: fruit, L: leaf, ISB: internal stem bark, R: root); Habitat (W: wild area, Hg: home garden, FL: farm land); Mode of utilization (F: fresh, D: dried); Used form (F: fresh, D: dried); Role in Food Security ( SF: supplementary food, FF: famine food); Other Use Values ( MD: medicine, FR: fodder, HH: household implements, FW: fuel wood, AT: agricultural tools, CO: construction).
